# Supplementary material for: Rational assembly of a 3D metal–organic framework for gas adsorption with predesigned cubic building blocks and 1D open channels
Source: Royal Society of Chemistry journal article supplement (doi:10.1039/b503667d), 2005-01-01
Supplement: b503667d.pdf [file b503667d.pdf]

## Supporting Information

### **Rational assembly of 3D metal-organic framework for gas adsorption with predesigned cubic building blocks and 1D open channels**

**Ru-Qiang Zou,<sup>a,b</sup> Ling Jiang,<sup>a,b</sup> Hiroshi Senoh,<sup>a</sup> Nobuhiko Takeichi<sup>a</sup> and Qiang Xu<sup>\*,a,b</sup>**

<sup>a</sup> *National Institute of Advanced Industrial Science and Technology (AIST), Ikeda, Osaka 563-8577, and* <sup>b</sup> *Graduate School of Science and Technology, Kobe University, Nada Ku, Kobe, Hyogo 657-8501, Japan; E-mail: [q.xu@aist.go.jp](mailto:q.xu@aist.go.jp)*

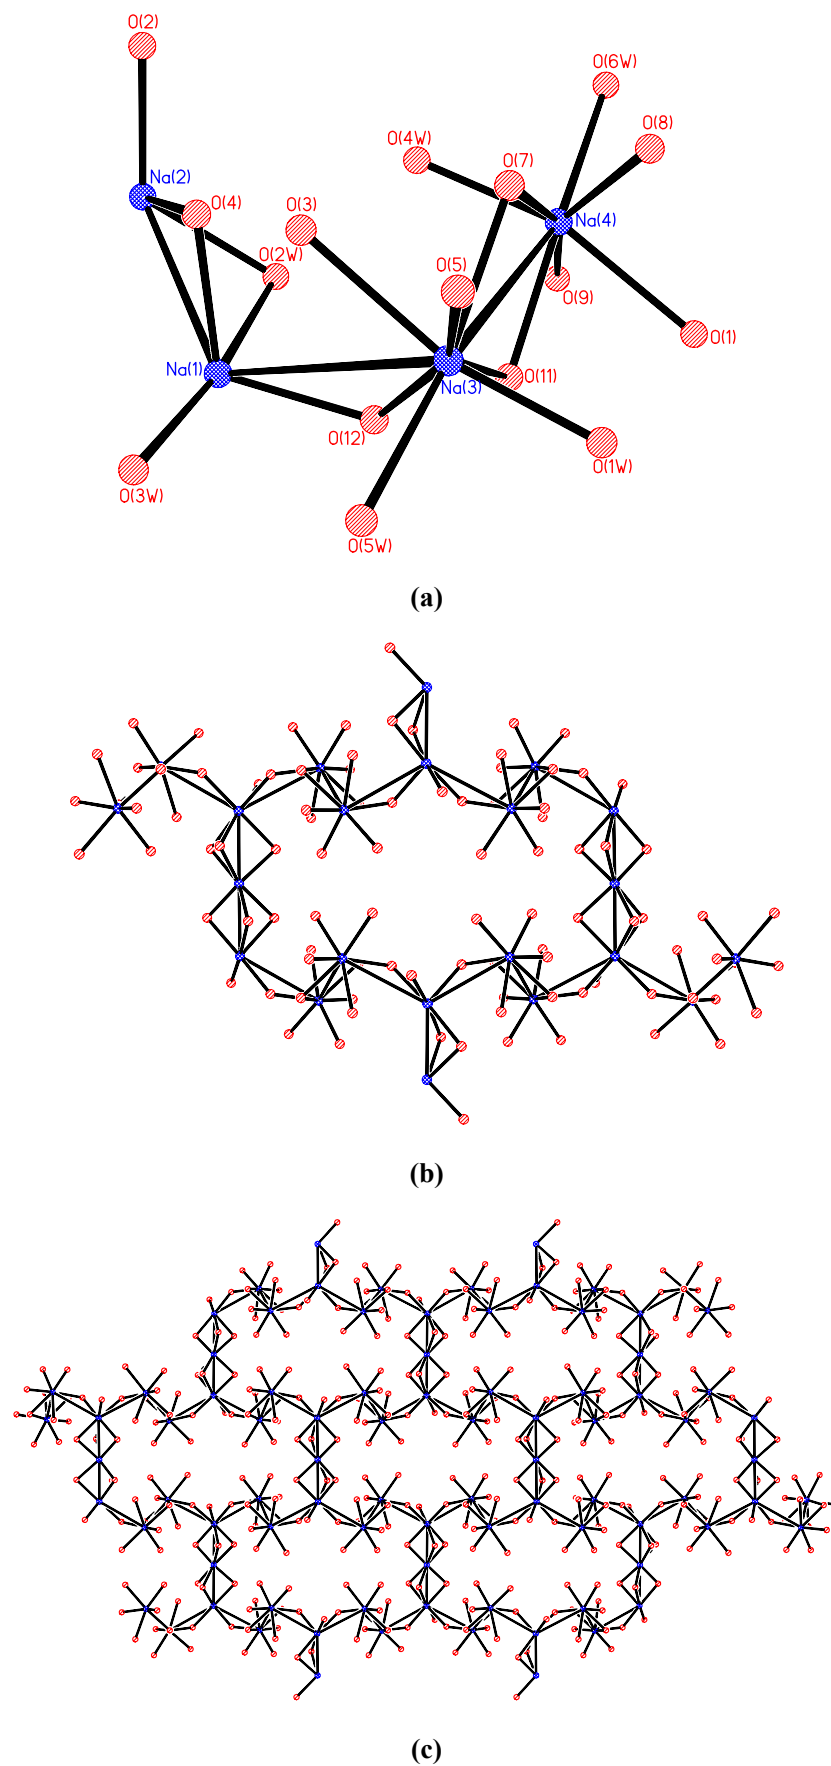

**SI-1** Views of **(a)** the coordination environment of Na(1)-Na(4) atoms, **(b)** the 16-membered macrometalloacyclic unit of **1** formed by Na(1)-Na(4) atoms and **(c)** the 2D layer formed through Na-Na and Na-O bonds in **1** along *c* axis.

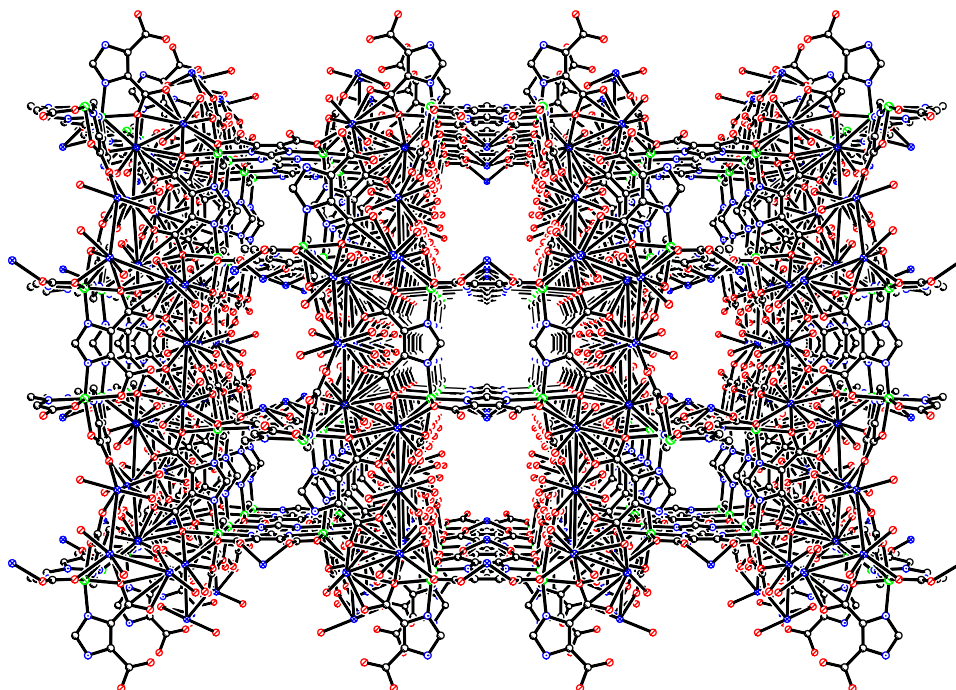

**SI-2** View of the 3D metal-organic framework of **1** with open channels (water and acetonitrile molecules were omitted for clarity).

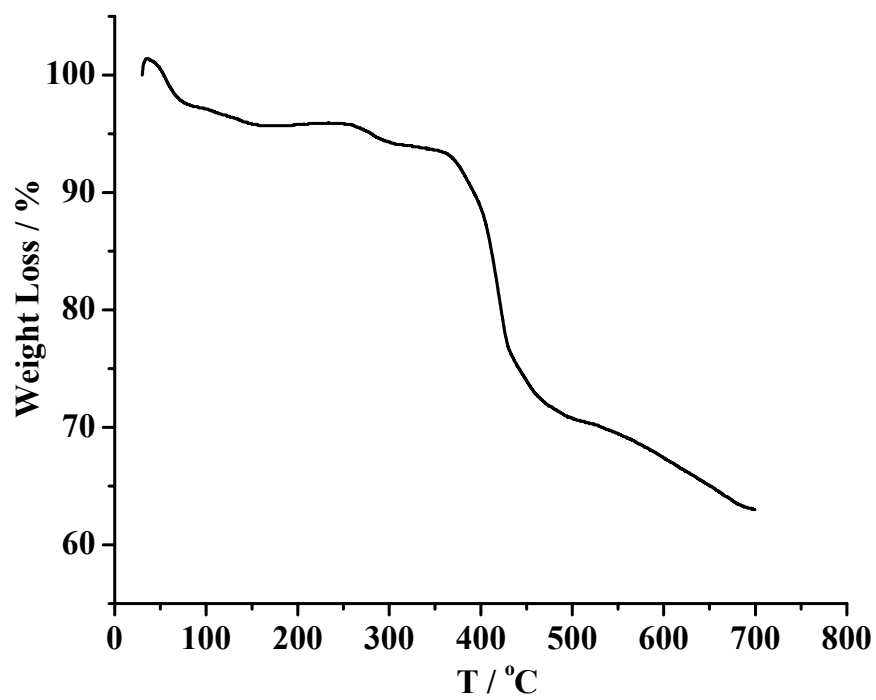

SI-3 TG pattern for 1.
